# Supplementary material
Source: Springer Nature journal article supplement (https://www.springermedizin.de/resource/supplementary/13098_2014_375_MOESM1_ESM.pdf/9670920)

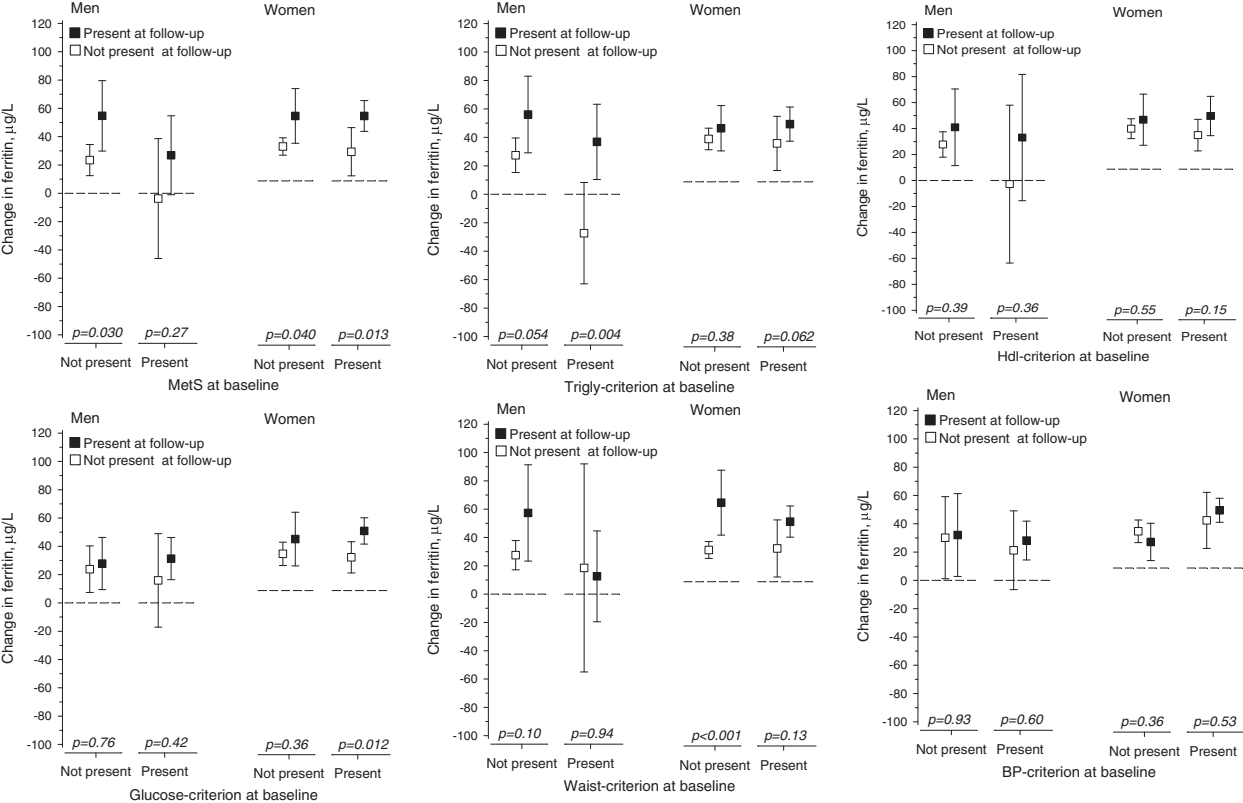

Supplement: MOESM1 [file 9670920]
